# Supplementary material for: First one-dimensional homochiral stairway-like Cu(ii) chains: crystal structures, circular dichroism (CD) spectra, ferroelectricity and antiferromagnetic properties
Source: Royal Society of Chemistry journal article supplement (doi:10.1039/c2dt32578k), 2013-01-01
Supplement: c2dt32578k.pdf [file c2dt32578k.pdf]

## Supporting Information for

### First one-dimensional homochiral stairway-like Cu(II) chains: crystal structures, circular dichroism (CD) spectra, ferroelectricity and antiferromagnetic properties

Xi-Li Li,<sup>\*a</sup> Chun-Lai Chen,<sup>a</sup> Li-Feng Han,<sup>a</sup> Cai-Ming Liu,<sup>b</sup> You Song,<sup>c</sup> Xiao-Gang Yang<sup>a</sup> and Shao-Ming Fang<sup>\*a</sup>

<sup>a</sup> Henan Provincial Key Laboratory of Surface and Interface Science, Zhengzhou University of Light Industry, Zhengzhou 450002, China. E-mail: lixl@zzu.edu.cn

<sup>b</sup> Beijing National Laboratory for Molecular Sciences, Institution of Chemistry, Chinese Academy of Sciences, Center for Molecular Sciences, Beijing 100190, China

<sup>c</sup> State Key Laboratory of Coordination Chemistry, School of Chemistry and Chemical Engineering, Nanjing National Laboratory of Microstructures, Nanjing University, Nanjing 210093, China

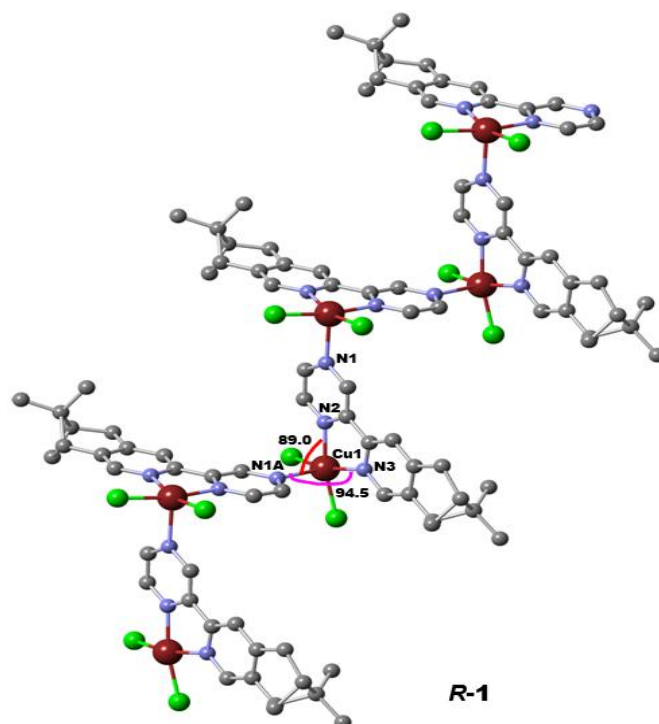

**Fig. S1** The molecular structure of **R-1**.

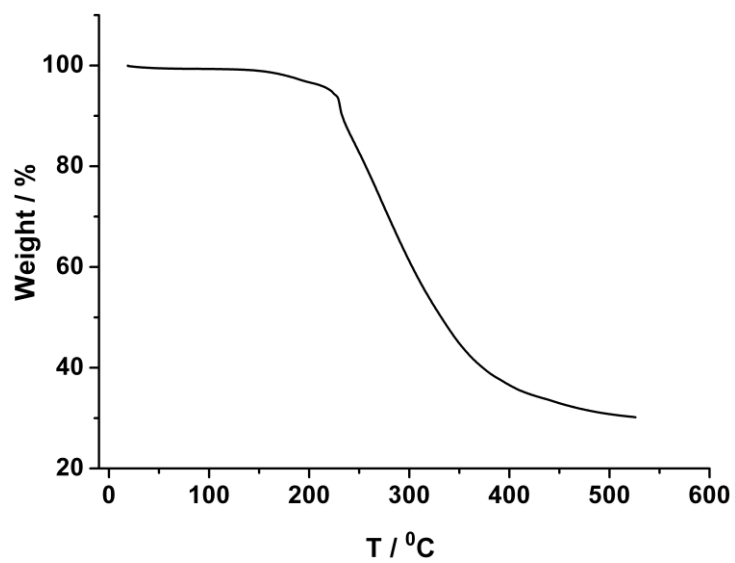

**Fig. S2** TG curve for *R-1*.
